# Supplementary material for: Hierarchical nanostructure of WO3 nanorods on TiO2 nanofibers and the enhanced visible light photocatalytic activity for degradation of organic pollutants
Source: Royal Society of Chemistry journal article supplement (doi:10.1039/c3ce40620b), 2013-01-01
Supplement: c3ce40620b.pdf [file c3ce40620b.pdf]

## Supporting Information

### Hierarchical nanostructure of $\text{WO}_3$ nanorods on $\text{TiO}_2$ nanofibers and its high visible light photocatalytic activity for degradation of organic pollutants

Li Zhang,<sup>a</sup> Yaogang Li,<sup>a</sup> Qinghong Zhang<sup>\*b</sup> and Hongzhi Wang<sup>\*a</sup>

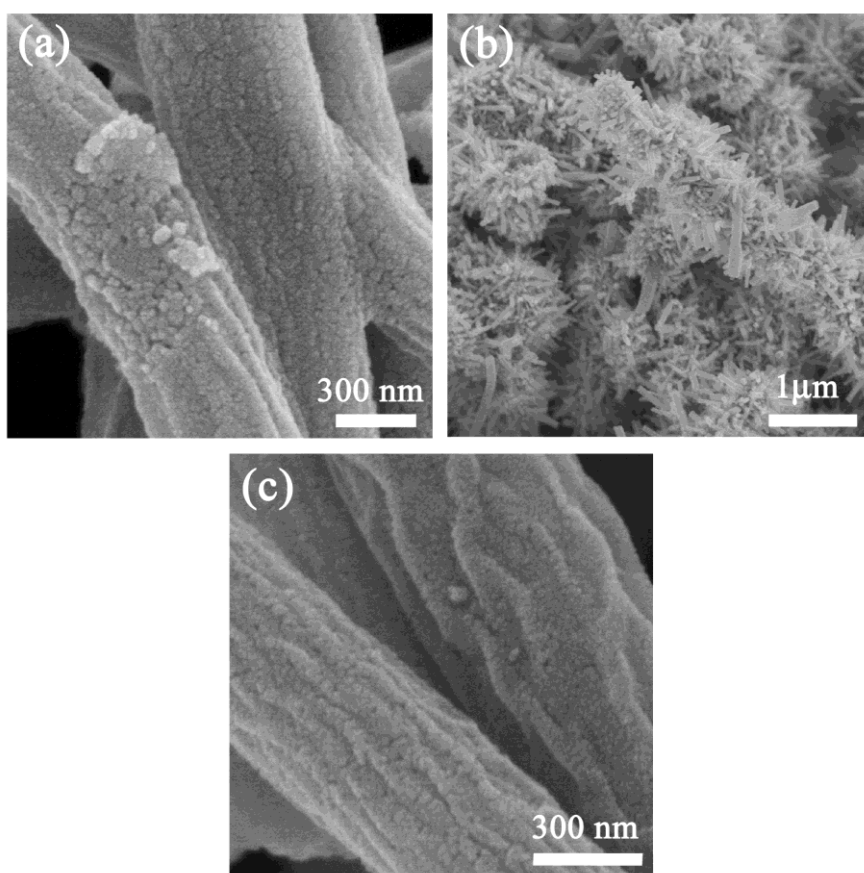

**Fig. S1** SEM images of the  $\text{TiO}_2$  nanofibers treated in the autoclave for 6 h at 180 °C (a), 18 h at 180 °C (b) and 12 h at 150 °C (c).

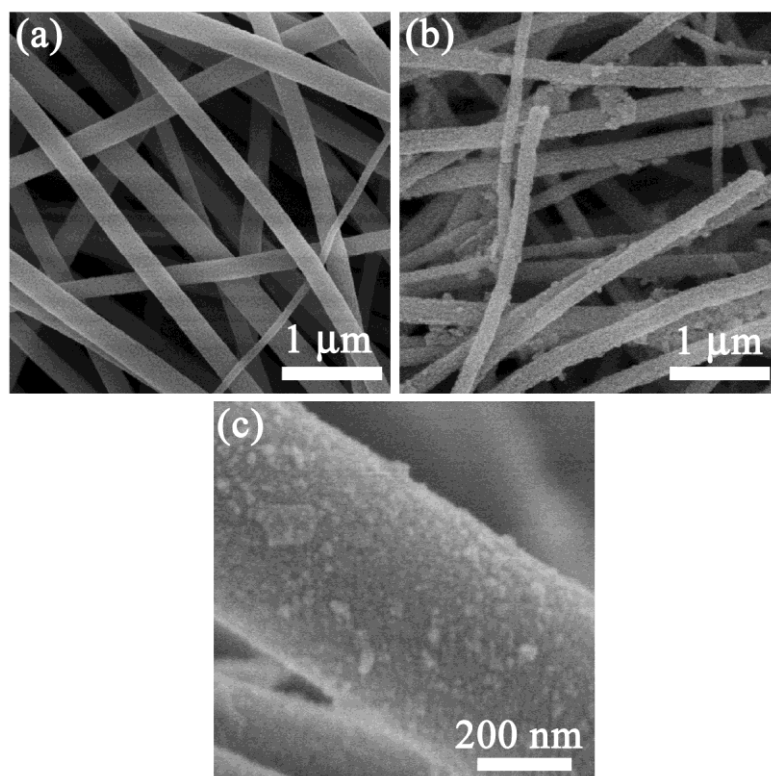

**Fig. S2** SEM images of the bare TiO<sub>2</sub> nanofibers (a), the TiO<sub>2</sub> nanofibers with WO<sub>3</sub> seed layer deposited onto them (b), and the high magnification of b (c).

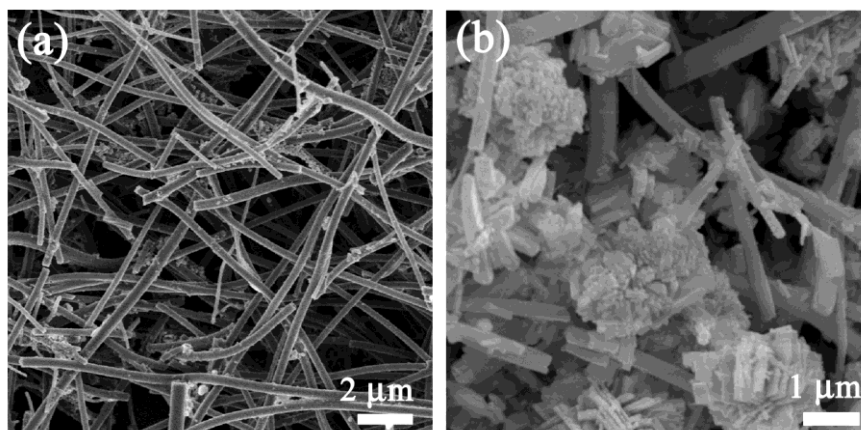

**Fig. S3** SEM images of the TiO<sub>2</sub> nanofibers treated in the autoclave under different conditions: (a) with WO<sub>3</sub> seed layer on the TiO<sub>2</sub> nanofibers and without HMT in the autoclave for 12 h at 180 °C, and (b) with HMT in the autoclave and without the WO<sub>3</sub> seed layer on the TiO<sub>2</sub> nanofibers for 12 h at 180 °C.
